# Supplementary material for: Effect of the molecular structure of the host materials on the lifetime of green thermally activated delayed fluorescent organic light-emitting diodes
Source: Royal Society of Chemistry journal article supplement (doi:10.1039/c5tc01065a), 2015-01-01
Supplement: c5tc01065a1.pdf [file c5tc01065a1.pdf]

## **Supporting information**

### **Effect of molecular structure of host materials on the lifetime of green thermally activated delayed fluorescent organic light-emitting diodes**

**Yirang Im, Wook Song, Jun Yeob Lee<sup>a)</sup>**

School of chemical and Engineering, Sunkyunkwan University

2066, Seobu-ro, Jangan-gu, Suwon-si, Gyeonggi-do, 448-701, Korea

## List of figures

Figure S1. Multicycle CV scan data of DBTTP1 (a) and DBTTP2 (b).

Figure S2. Quantum efficiency-luminance data of DBTTP1 device according to 4CzIPN doping concentration.

Figure S3 Quantum efficiency-luminance data of DBTTP2 device according to 4CzIPN doping concentration.

Figure S4. PL data of 4CzIPN doped film according to 4CzIPN doping concentration.

Figure S5. Lifetime data of DBTTP1 and DBTTP2 devices with 30% 4CzIPN doping concentration.

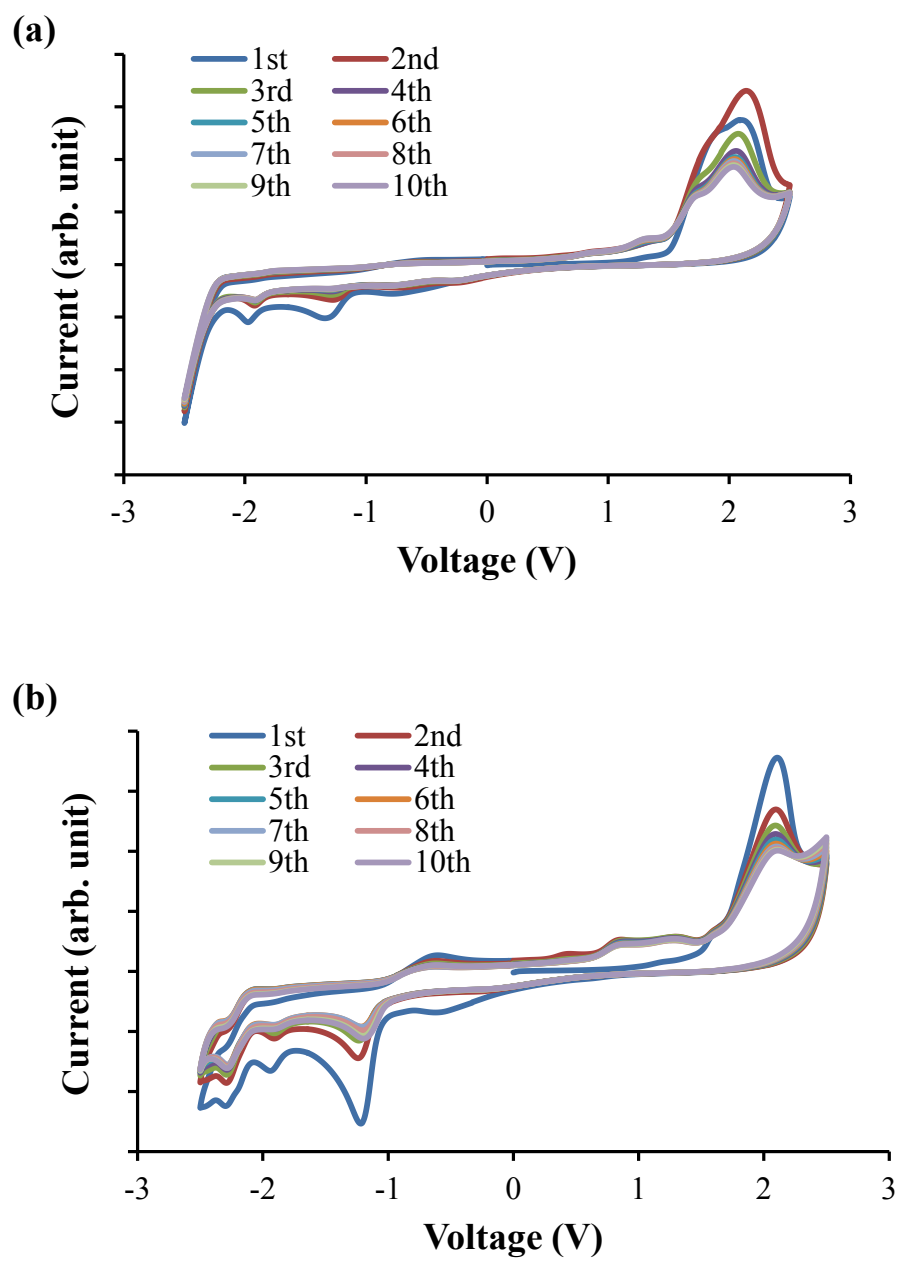

Figure S1

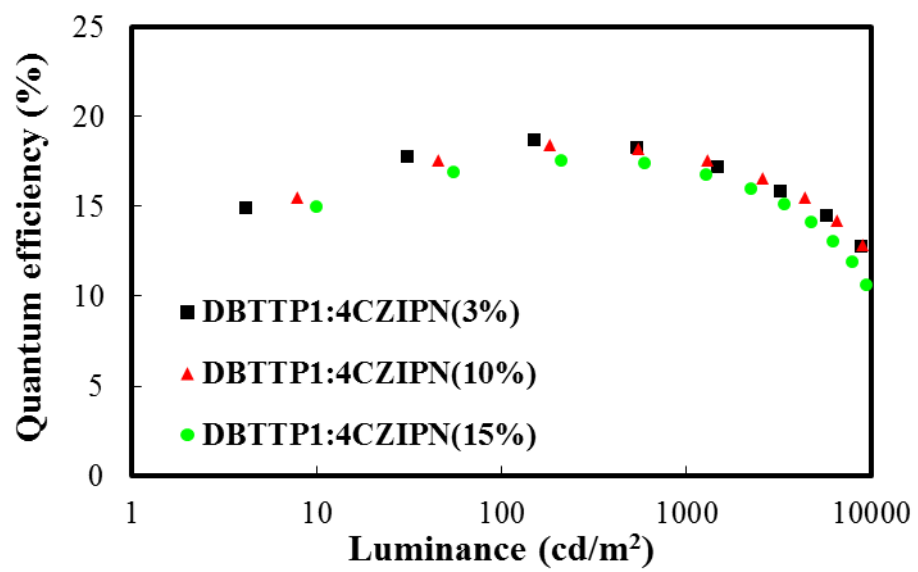

Figure S2

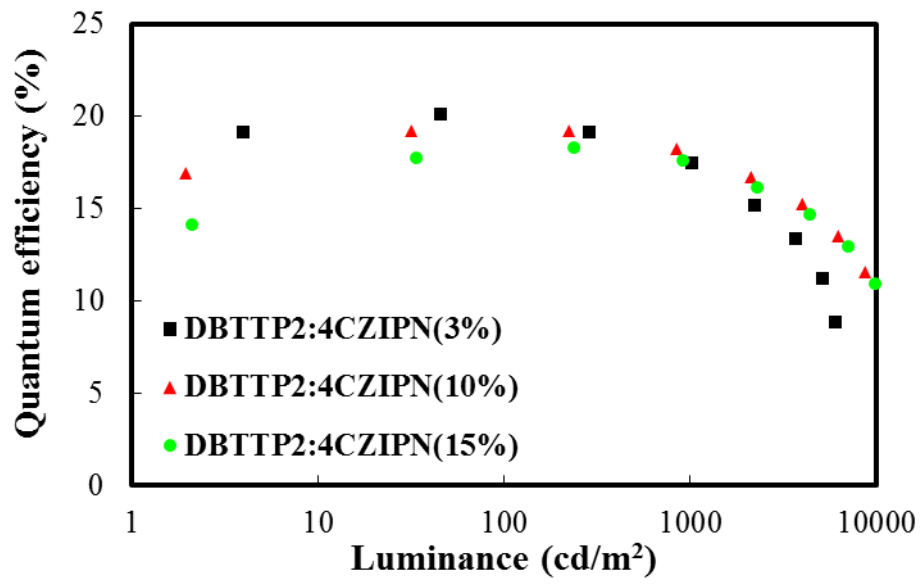

Figure S3

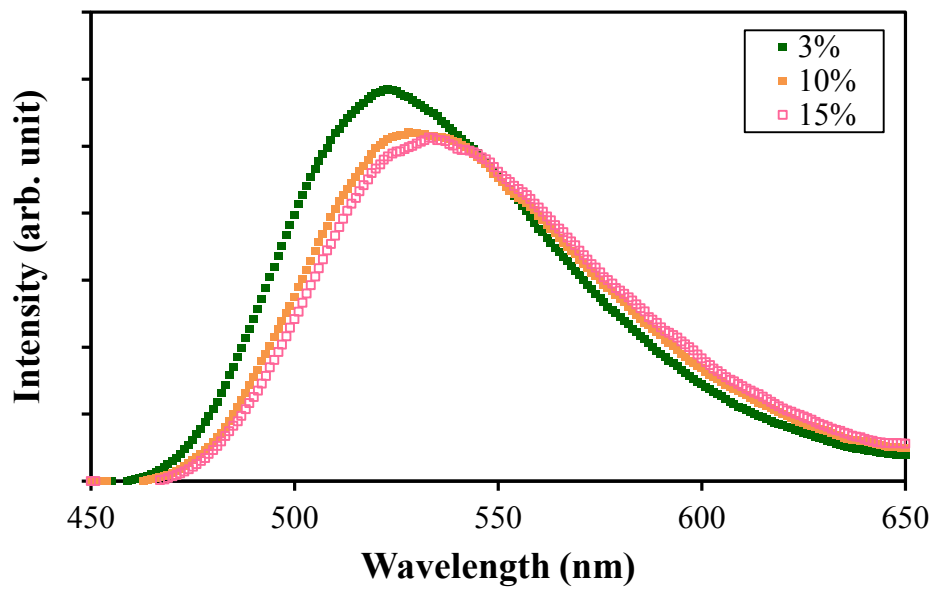

Figure S4

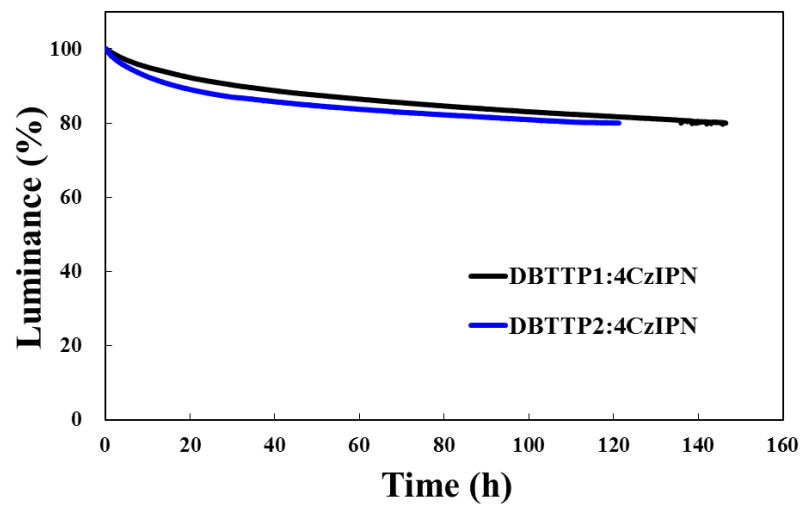

Figure S5
